# Supplementary material
Source: PubMed Central journal article supplement (PMC5337440)
Supplement: NIHMS841890-supplement-supplement_1.pdf [file NIHMS841890-supplement-supplement_1.pdf]

## SUPPLEMENTAL TABLE 1

## Baseline and ART characteristics of the population.

| Variable                                 | Value               |
|------------------------------------------|---------------------|
| Age (y)                                  | 35.0 (32–39)        |
| Body mass index (kg/m <sup>2</sup> )     | 25 (22–29)          |
| E <sub>2</sub> on day of trigger (pg/mL) | 2,230 (1,590–3,041) |
| Primary infertility diagnosis (%)        |                     |
| Male                                     | 27                  |
| Unexplained                              | 26                  |
| Diminished ovarian reserve               | 12                  |
| Ovulatory                                | 12                  |
| Tubal                                    | 10                  |
| Endometriosis                            | 4                   |
| Uterine                                  | 3                   |
| Other                                    | 6                   |
| P on day of trigger (ng/mL)              | 0.98 (0.70–1.30)    |
| Total gonadotropins (IU)                 | 3,825 (2,550–6,000) |
| Oocytes retrieved                        | 12 (8–17)           |
| No. of embryos transferred               | 1.71 ± 0.41         |
| Blastocyst stage transfer (%)            | 67                  |
| Good grade embryo transfer (%)           | 85                  |
| Live birth (%)                           | 40                  |

Note: Values are median (IQR) or mean ± SD or overall percentage.

Hill. Progesterone to oocyte ratio. *Fertil Steril* 2016.

## SUPPLEMENTAL FIGURE 1

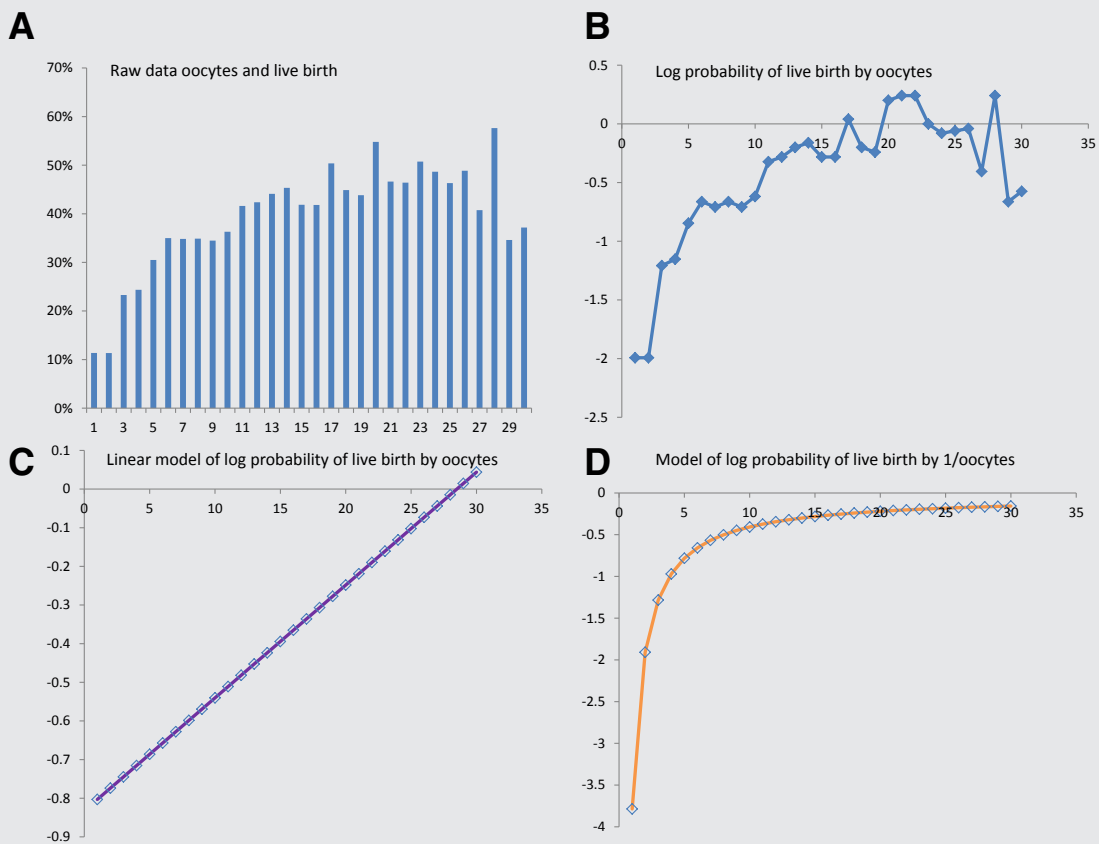

Visual demonstration of how changing oocytes to 1/oocytes may affect modeling. Oocytes is on the x-axis of all graphs. Raw live birth percentage (A) and log probability of live birth (B–D) is on the y-axis. (A) Raw live birth rates per oocytes retrieved. (B) Log probability of live birth by oocytes retrieved. (C) Linear probability of live birth by oocytes retrieved. (D) Log probability of live birth by 1/oocytes.

Hill. Progesterone to oocyte ratio. *Fertil Steril* 2016.
